# Supplementary material
Source: Springer Nature journal article supplement (https://www.springermedizin.de/resource/supplementary/12889_2013_6677_MOESM3_ESM.pdf/9498750)

**a**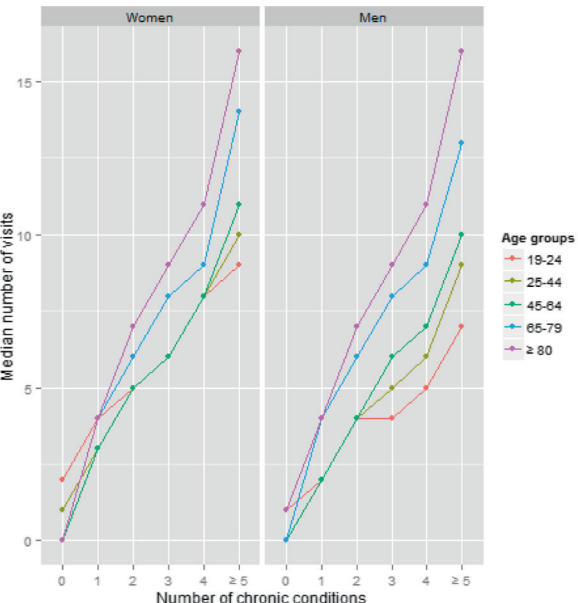**b**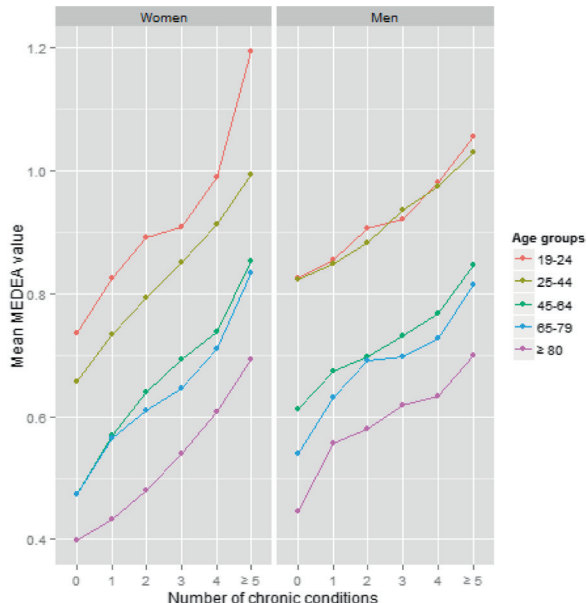

Supplement: MOESM3 [file 9498750]
